# Supplementary material
Source: Research Square preprint supplement (doi:10.21203/rs.3.rs-8970445/v1)
Supplement: Supplementary file 1 [file 100ff3ce8bedfd8f88f7a6ff.docx]

# Supplementary material:

Supplementary Table : Eigenvalues of the Correlation Matrix

|  | **Eigenvalue** | **Difference** | **Proportion** | **Cumulative** |
| --- | --- | --- | --- | --- |
| **1** | 3.19 | 0.79 | 0.25 | 0.25 |
| **2** | 2.40 | 0.64 | 0.18 | 0.43 |
| **3** | 1.76 | 0.51 | 0.14 | 0.57 |
| **4** | 1.25 | 0.23 | 0.10 | 0.66 |
| **5** | 1.01 | 0.16 | 0.08 | 0.74 |
| **6** | 0.85 | 0.25 | 0.06 | 0.80 |

Supplementary Table : Rotated Factor Pattern

|  | **Factor1** | **Factor2** | **Factor3** | **Factor4** | **Factor5** |
| --- | --- | --- | --- | --- | --- |
| **Factor labels** | **Lipids** | **Insulin**  **resistance** | **Blood**  **pressure** | **Inflammation**  **Obesity** | **Serum urate**  **Central obesity** |
| **Cholesterol** | 0.97 | 0.18 | 0.09 | -0.03 | 0.06 |
| **LDL** | 0.92 | 0.09 | 0.04 | 0.07 | 0.10 |
| **HDL** | 0.55 | -0.36 | 0.16 | -0.24 | -0.33 |
| **HOMA-IR** | -0.01 | 0.81 | 0.17 | -0.02 | -0.08 |
| **VLDL** | 0.09 | 0.77 | -0.03 | -0.05 | 0.30 |
| **Hepatic fat deposition** | 0.11 | 0.69 | 0.01 | 0.36 | 0.15 |
| **Systolic BP** | 0.07 | 0.04 | 0.91 | 0.11 | 0.08 |
| **Diastolic BP** | 0.04 | 0.15 | 0.84 | 0.08 | -0.04 |
| **Age** | 0.28 | -0.27 | 0.53 | -0.19 | 0.41 |
| **hsCRP** | 0.07 | 0.05 | -0.03 | 0.86 | -0.11 |
| **BMI** | -0.16 | 0.05 | 0.19 | 0.72 | 0.30 |
| **Serum Urate** | 0.04 | 0.15 | 0.00 | 0.03 | 0.80 |
| **Central obesity (VAT)** | 0.01 | 0.25 | 0.38 | 0.40 | 0.58 |

Legend: LDL = low density, the protein, HDL = high density, the protein, HOMA-IR = Homeostatic Model Assessment of Insulin Resistance, VDL = very low-density lip, protein, BP = blood pressure, hsCRP = high sensitivity, C-reactive protein, VAT = visceral adipose tissue
